# Supplementary material for: Chemosensory Profile of South Tyrolean Pinot Blanc Wines: A Multivariate Regression Approach
Source: MDPI journal article supplement (doi:10.3390/molecules26206245), 2021-10-15
Supplement: s1 [file s1]

# **Chemosensory Profile of South Tyrolean Pinot Blanc Wines: A Multivariate Regression Approach**

Simone Poggesi <sup>1,2</sup>, Amanda Dupas de Matos <sup>3,4</sup>, Edoardo Longo <sup>1,2\*</sup>, Danila Chiotti <sup>5</sup>, Ulrich Pedri <sup>5</sup>, Daniela Eisenstecken <sup>5</sup>, Peter Robatscher <sup>5</sup>, Emanuele Boselli <sup>1,2</sup>

1 Faculty of Science and Technology, Free University of Bozen-Bolzano, Piazza Università 5, 39100 Bolzano, Italy; simone.poggesi@natec.unibz.it; emanuele.boselli@unibz.it; edoardo.longo@unibz.it

2 Oenolab, NOI Techpark, via Alessandro Volta 13, 39100 Bolzano BZ, Italy

3 Food Experience and Sensory Testing (Feast) Lab, Massey University, Palmerston North 4410, New Zealand; a.dupasdematos@massey.ac.nz

4 Riddet Institute, Massey University, Palmerston North 4410, New Zealand; a.dupasdematos@massey.ac.nz

5 Laimburg Research Centre, Laimburg 6, Pfatten (Vadena), 39040 Auer, Italy; danila.chiotti@laimburg.it; ulrich.pedri@laimburg.it; daniela.eisenstecken@laimburg.it; peter.robatscher@laimburg.it;

\*Correspondence to: edoardo.longo@unibz.it; ORCID ID: 0000-0002-0594-6722

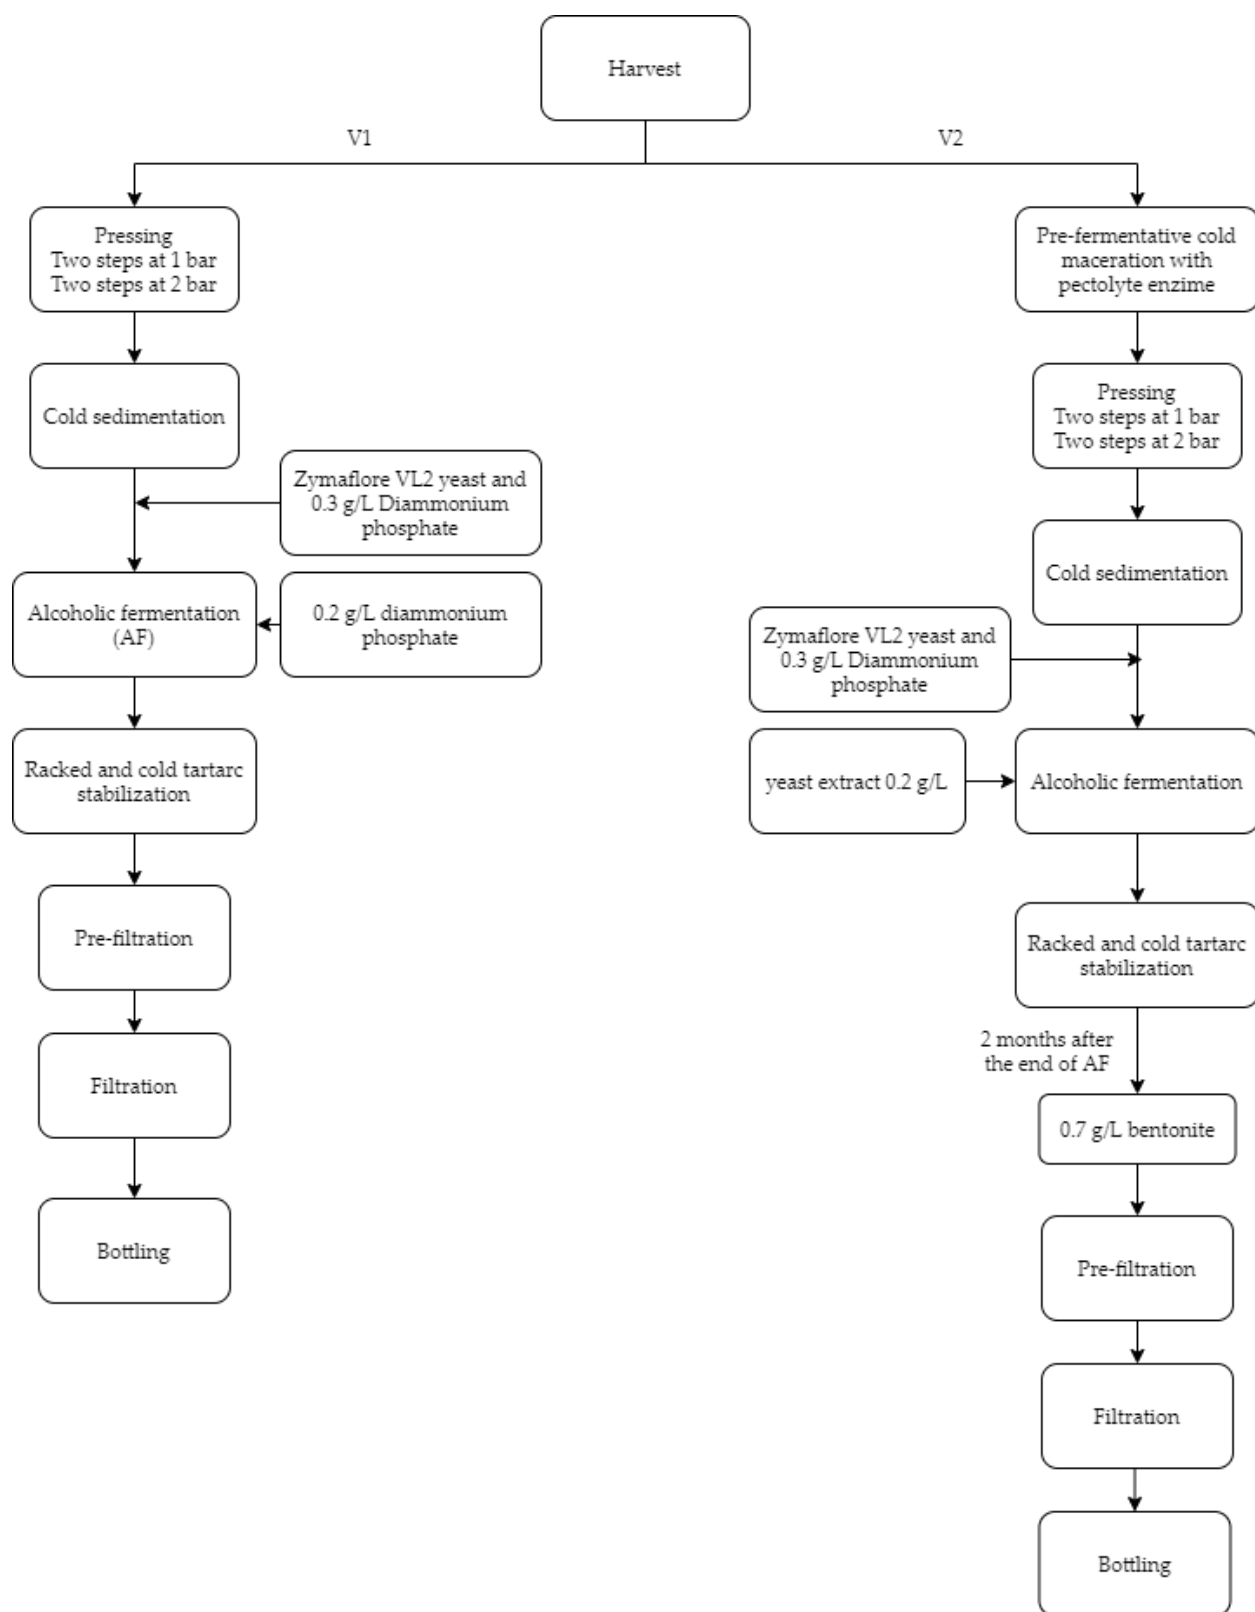

**Figure S1.** Flowchart of the control (V1) and experimental (V2) winemaking procedures.

**Table S1.** One-way ANOVA on the phenolic compounds for Time *versus* Retention Time (RT). Only the significant variables are shown according to Tukey HSD test (95% confidence). W: wine, 3, 6, 9, 12,18: months of storage in bottle. Different letters in the same column indicate significant differences evaluated by the *post-hoc* test.

| Time\RT  | 3.89     | 4.47       | 4.69      | 5.8       | 7.26       | 12.88      | 16.75     | 17.36     | 21.9     | 22.24      | 23.39     |
|----------|----------|------------|-----------|-----------|------------|------------|-----------|-----------|----------|------------|-----------|
| W9       | 3288.1 a | 20438.1 b  | 17628.8 b | 1702.0 a  | 18341.7 ab | 56919.5 ab | 49699.3 a | 61300.3 a | 8896.0 b | 25465.2 b  | 11188.3 a |
| W3       | 1800.0 a | 30526.2 c  | 4206.0 a  | 5903.1 b  | 5955.2 a   | 64403.7 b  | 49376.3 a | 42753.3 a | 5247.5 a | 16231.0 ab | 22100.7 b |
| W6       | 8441.0 b | 20197.9 b  | 34321.4 c | 10087.0 c | 19235.0 ab | 47547.3 a  | 63696.2 b | 40103.2 a | 5228.2 a | 17800.8 ab | 23030.0 b |
| W18      | 506.0 a  | 18052.3 ab | 18989.8 b | 4599.8 b  | 36395.5 b  | 58064.5 ab | 47620.3 a | 59558.7 a | 3763.3 a | 7555.5 a   | 9914.2 a  |
| W12      | 1232.5 a | 12401.8 a  | 22580.2 b | 6172.5 b  | 11905.0 ab | 63430.8 b  | 50940.7 a | 60612.7 a | 2756.5 a | 24259.7 b  | 11338.2 a |
| Pr >     | <0.0001  | <0.0001    | <0.0001   | <0.0001   | 0.0        | 0.0        | 0.0       | 0.0       | <0.0001  | 0.0        | <0.0001   |
| F(Model) |          |            |           |           |            |            |           |           |          |            |           |

  

| Time\RT  | 24.07      | 24.75       | 26.17      | 26.63     | 27.24      | 36.35     | 41.74      | 45.22      | 47.49     | 48.46    | 50.22     | 51.81     |
|----------|------------|-------------|------------|-----------|------------|-----------|------------|------------|-----------|----------|-----------|-----------|
| W9       | 22464.5 b  | 97200.2 ab  | 6191.3 abc | 2169.7 b  | 16021.7 b  | 46069.0 b | 21531.3 a  | 46888.3 ab | 8035.3 a  | 6430.5 b | 17323.5 a | 7822.7 bc |
| W3       | 14291.7 ab | 125611.3 b  | 9823.5 c   | 1760.4 ab | 11376.3 ab | 19658.0 a | 25755.7 b  | 42937.3 a  | 13788.3 b | 5988.8 b | 17748.7 a | 2581.3 a  |
| W6       | 8977.3 a   | 92611.2 a   | 6427.3 bc  | 1774.5 ab | 7772.8 a   | 20637.3 a | 23537.3 ab | 44769.8 ab | 12114.3 b | 6314.5 b | 18630.8 a | 4070.2 ab |
| W18      | 22056.2 b  | 99486.3 ab  | 2257.5 a   | 1099.3 a  | 11176.7 ab | 26063.5 a | 25006.3 b  | 52230.7 ab | 5351.7 a  | 9414.8 c | 88341.8 b | 9627.3 c  |
| W12      | 21887.3 b  | 101610.2 ab | 3065.5 ab  | 1871.5 ab | 12797.2 ab | 15798.2 a | 24992.0 b  | 59852.3 b  | 8249.5 a  | 2507.3 a | 3992.2 a  | 7330.2 bc |
| Pr >     | 0.0        | 0.0         | <0.0001    | 0.0       | 0.0        | <0.0001   | 0.0        | 0.0        | <0.0001   | <0.0001  | 0.0       | 0.0       |
| F(Model) |            |             |            |           |            |           |            |            |           |          |           |           |

**Table S2.** One-way ANOVA on the non-volatile phenolic compounds for Wine *versus* Retention Time (RT). Only the significant variables are shown according to Tukey HSD test (95% confidence). V1: vinification without maceration, V2: vinification with maceration. Different letters in the same column indicate significant differences evaluated by the *post-hoc* test.

| Wine\RT       | 6.37        | 6.54        | 7.26        | 7.72        | 10.5        | 12.44       | 12.88       | 20.3        | 23.39       |
|---------------|-------------|-------------|-------------|-------------|-------------|-------------|-------------|-------------|-------------|
| V1            | 13303.55791 | 103084.6667 | 25395.46667 | 11014.93333 | 34770.8     | 107792.2667 | 61681.13333 | 10977.6448  | 19075.13333 |
| V2            | 21701.15975 | 63514.2     | 11337.46667 | 27229.73333 | 13467.13333 | 92370.06667 | 54465.2     | 14281.77206 | 11953.4     |
| Pr > F(Model) | 1.13974E-13 | 0.000488579 | 0.023403043 | 1.36515E-07 | 2.0135E-13  | 4.70443E-05 | 0.033348646 | 0.004016983 | 0.004127918 |

  

| Wine\RT       | 24.07       | 24.75       | 26.17       | 26.63       | 27.95       | 29.34       | 31.08       | 32.81       | 33.72       |
|---------------|-------------|-------------|-------------|-------------|-------------|-------------|-------------|-------------|-------------|
| V1            | 13809.06667 | 93030.4     | 4080.066667 | 2052.611729 | 250679.2    | 19873.46667 | 55279.26667 | 38959.8     | 48289.6     |
| V2            | 22061.73333 | 113577.2667 | 7026        | 1417.552201 | 508562.1333 | 38061.4     | 97961.13333 | 76934.46667 | 120903.6667 |
| Pr > F(Model) | 0.000878166 | 0.003021913 | 0.018461931 | 0.002287998 | 2.44218E-18 | 5.69089E-16 | 1.40708E-15 | 8.07304E-08 | 1.75768E-11 |

  

| Wine\RT       | 36.88       | 39.95       | 45.22       | 49.63       | 50.22       | 51.81       | 52.65       | 53.04       |
|---------------|-------------|-------------|-------------|-------------|-------------|-------------|-------------|-------------|
| V1            | 15005.95698 | 2416.466667 | 41192.06667 | 13579.29003 | 11939.4     | 4461        | 3039.333333 | 767.4756234 |
| V2            | 31684.43425 | 9363.2      | 57479.33333 | 135377.113  | 46475.4     | 8111.666667 | 7119.933333 | 5753.476344 |
| Pr > F(Model) | 8.89444E-11 | 1.28499E-12 | 1.79411E-06 | 7.0476E-21  | 0.027673707 | 0.002900883 | 0.005857537 | 1.35533E-08 |

**Table S3.** Two-way ANOVA on the non-volatile phenolic compounds for Wine\*Time *versus* Retention Time. Only the significant variables are shown according to Tukey HSD test (95% confidence). W: wine, 3, 6, 9, 12,18: months of storage in bottle, 1: wine without maceration, 2: wine with maceration. Different letters in the same column indicate significant differences evaluated by the *post-hoc* test.

| Wine*Time\RT  | 3.89     | 4.47        | 4.69       | 5.8       | 6.37       | 6.54        | 7.26      |
|---------------|----------|-------------|------------|-----------|------------|-------------|-----------|
| W3*2          | 1854.3 a | 25385.7 c   | 4187.3 a   | 6686.1 bc | 21089.4 bc | 71198.7 abc | 654.7 a   |
| W6*2          | 9007.3 b | 18448.5 abc | 27217.5 c  | 11401.7 d | 20337.0 b  | 40767.7 a   | 18524.3 a |
| W9*2          | 299.0 a  | 18552.1 abc | 14288.7 ab | 1662.0 a  | 23318.3 bc | 57391.7 ab  | 18536.0 a |
| W18*2         | 513.0 a  | 17372.7 abc | 14571.3 ab | 5503.0 b  | 24024.2 c  | 71395.0 abc | 14721.7 a |
| W12*2         | 1103.0 a | 10212.7 a   | 19014.7 bc | 6352.3 bc | 19736.8 b  | 76818.0 bc  | 4250.7 a  |
| W3*1          | 1745.7 a | 35666.7 d   | 4224.7 a   | 5120.1 b  | 13825.1 a  | 113182.0 d  | 11255.7 a |
| W9*1          | 6277.2 b | 22324.1 bc  | 20969.0 bc | 1742.0 a  | 14079.3 a  | 160483.3 e  | 18147.3 a |
| W6*1          | 7874.7 b | 21947.3 bc  | 41425.3 d  | 8772.3 cd | 11876.3 a  | 69247.7 abc | 19945.7 a |
| W12*1         | 1362.0 a | 14591.0 ab  | 26145.7 c  | 5992.7 bc | 13098.8 a  | 93899.7 cd  | 19559.3 a |
| W18*1         | 499.0 a  | 18732.0 abc | 23408.3 bc | 3696.7 ab | 13638.2 a  | 78610.7 bcd | 58069.3 b |
| Pr > F(Model) | <0.0001  | <0.0001     | <0.0001    | <0.0001   | <0.0001    | <0.0001     | 0.0       |

  

| Wine*Time\RT  | 7.72        | 10.5       | 12.44       | 12.88      | 21.9      | 22.24      | 23.39      |
|---------------|-------------|------------|-------------|------------|-----------|------------|------------|
| W3*2          | 34653.3 d   | 6570.3 a   | 96755.7 ab  | 60633.7 ab | 6105.9 ab | 14567.7 ab | 18002.0 cd |
| W6*2          | 17968.0 abc | 11397.7 ab | 91645.7 ab  | 44942.3 a  | 6095.9 ab | 17585.7 ab | 19655.0 d  |
| W9*2          | 22606.0 bcd | 14950.7 bc | 94825.3 ab  | 54184.0 ab | 9141.0 b  | 23061.7 ab | 8004.0 ab  |
| W18*2         | 31286.3 cd  | 20240.0 c  | 84670.0 a   | 54313.7 ab | 5308.7 ab | 6233.3 a   | 6726.7 a   |
| W12*2         | 29635.0 cd  | 14177.0 bc | 93953.7 ab  | 58252.3 ab | 3195.7 a  | 22520.7 ab | 7379.3 ab  |
| W3*1          | 15636.3 ab  | 31562.0 d  | 114042.0 b  | 68173.7 b  | 4389.0 a  | 17894.3 ab | 26199.3 e  |
| W9*1          | 9258.0 ab   | 39460.0 e  | 107700.0 ab | 59655.0 ab | 8651.0 b  | 27868.7 b  | 14372.7 cd |
| W6*1          | 7767.0 a    | 35779.7 de | 107695.3 ab | 50152.3 ab | 4360.5 a  | 18016.0 ab | 26405.0 e  |
| W12*1         | 9896.3 ab   | 31223.3 d  | 110007.7 ab | 68609.3 b  | 2317.3 a  | 25998.7 ab | 15297.0 cd |
| W18*1         | 12517.0 ab  | 35829.0 de | 99516.3 ab  | 61815.3 ab | 2218.0 a  | 8877.7 ab  | 13101.7 bc |
| Pr > F(Model) | <0.0001     | <0.0001    | 0.0         | 0.0        | <0.0001   | 0.0        | <0.0001    |

  

| Wine*Time\RT | 24.07       | 24.75        | 26.17     | 26.63      | 27.24      | 27.95      | 29.34      |
|--------------|-------------|--------------|-----------|------------|------------|------------|------------|
| W3*2         | 17380.7 cd  | 133964.7 c   | 12685.7 e | 1488.6 abc | 13062.0 ab | 515144.7 b | 41067.7 c  |
| W6*2         | 11343.3 abc | 108594.0 abc | 8470.7 d  | 1495.5 abc | 8015.7 a   | 511929.0 b | 38261.3 bc |

|               |             |              |            |            |            |            |            |
|---------------|-------------|--------------|------------|------------|------------|------------|------------|
| W9*2          | 28996.0 e   | 100966.7 abc | 8234.0 cd  | 1699.7 abc | 18929.7 b  | 508564.0 b | 33589.3 b  |
| W18*2         | 26188.7 e   | 112983.7 abc | 2439.0 a   | 840.7 a    | 11302.7 ab | 514768.3 b | 39918.0 bc |
| W12*2         | 26400.0 e   | 111377.3 abc | 3300.7 ab  | 1563.3 abc | 13411.0 ab | 492404.7 b | 37470.7 bc |
| W3*1          | 11202.7 ab  | 117258.0 bc  | 6961.3 bcd | 2032.3 abc | 9690.7 ab  | 269719.0 a | 20807.3 a  |
| W9*1          | 15933.0 bcd | 93433.7 ab   | 4148.7 ab  | 2639.7 c   | 13113.7 ab | 238527.3 a | 18067.7 a  |
| W6*1          | 6611.3 a    | 76628.3 a    | 4384.0 abc | 2053.5 abc | 7530.0 a   | 259296.0 a | 19252.3 a  |
| W12*1         | 17374.7 bcd | 91843.0 ab   | 2830.3 a   | 2179.7 bc  | 12183.3 ab | 239239.7 a | 18597.0 a  |
| W18*1         | 17923.7 d   | 85989.0 ab   | 2076.0 a   | 1358.0 ab  | 11050.7 ab | 246614.0 a | 22643.0 a  |
| Pr > F(Model) | <0.0001     | 0.0          | <0.0001    | 0.0        | 0.0        | <0.0001    | <0.0001    |

| Wine*Time\RT  | 31.08      | 32.81      | 33.72       | 36.35      | 36.88      | 39.95     | 41.74      |
|---------------|------------|------------|-------------|------------|------------|-----------|------------|
| W3*2          | 94549.7 b  | 109866.3 d | 106488.3 bc | 21442.0 ab | 26144.0 bc | 8321.7 b  | 26028.0 b  |
| W6*2          | 102288.3 b | 68278.3 bc | 125859.3 c  | 23042.0 ab | 35710.0 c  | 10855.3 b | 24029.0 ab |
| W9*2          | 105071.0 b | 65131.0 bc | 124191.0 c  | 54874.0 d  | 31923.8 c  | 8746.0 b  | 22949.0 ab |
| W18*2         | 93399.0 b  | 71090.0 c  | 120366.0 c  | 31192.7 bc | 30758.3 c  | 9234.7 b  | 25589.3 b  |
| W12*2         | 94497.7 b  | 70306.7 c  | 127613.7 c  | 13115.0 a  | 33886.0 c  | 9658.3 b  | 25071.3 b  |
| W3*1          | 50455.7 a  | 56996.0 b  | 38817.3 a   | 17874.0 a  | 12947.7 a  | 3536.0 a  | 25483.3 b  |
| W9*1          | 59509.0 a  | 29470.7 a  | 48968.7 a   | 37264.0 c  | 14122.5 ab | 1398.3 a  | 20113.7 a  |
| W6*1          | 59733.7 a  | 32124.3 a  | 57590.0 ab  | 18232.7 a  | 15980.0 ab | 1526.3 a  | 23045.7 ab |
| W12*1         | 53971.7 a  | 37479.7 a  | 61636.7 ab  | 18481.3 a  | 17364.7 ab | 2893.7 a  | 24912.7 b  |
| W18*1         | 52726.3 a  | 38728.3 a  | 34435.3 a   | 20934.3 ab | 14615.0 ab | 2728.0 a  | 24423.3 ab |
| Pr > F(Model) | <0.0001    | <0.0001    | <0.0001     | <0.0001    | <0.0001    | <0.0001   | 0.0        |

| Wine*Time\RT | 45.22       | 47.49       | 48.46     | 49.63      | 50.22      | 51.81      | 53.04    |
|--------------|-------------|-------------|-----------|------------|------------|------------|----------|
| W3*2         | 46516.7 bcd | 14467.3 e   | 6363.0 b  | 144702.0 c | 25679.7 e  | 2866.0 ab  | 5630.0 b |
| W6*2         | 53120.7 d   | 12661.3 de  | 6537.0 bc | 142426.0 c | 25806.7 e  | 4642.7 abc | 7394.7 c |
| W9*2         | 54675.3 de  | 8856.0 bcd  | 6994.3 bc | 134424.0 c | 23604.0 de | 11293.7 e  | 5624.4 b |
| W18*2        | 63374.3 ef  | 6439.7 ab   | 8986.0 cd | 148942.6 c | 155744.3 f | 12262.3 e  | 8286.7 c |
| W12*2        | 69709.7 f   | 9711.7 bcd  | 2084.0 a  | 106391.0 b | 1542.3 a   | 9493.7 de  | 1831.7 a |
| W3*1         | 39358.0 ab  | 13109.3 de  | 5614.7 b  | 20306.0 a  | 9817.7 bc  | 2296.7 a   | 242.7 a  |
| W9*1         | 39101.3 ab  | 7214.7 abc  | 5866.7 b  | 11906.7 a  | 11043.0 c  | 4351.7 abc | 876.6 a  |
| W6*1         | 36419.0 a   | 11567.3 cde | 6092.0 b  | 16124.7 a  | 11455.0 c  | 3497.7 ab  | 1060.1 a |

|               |             |           |          |           |           |           |          |
|---------------|-------------|-----------|----------|-----------|-----------|-----------|----------|
| W12*1         | 49995.0 cd  | 6787.3 ab | 2930.7 a | 5998.0 a  | 6442.0 b  | 5166.7 bc | 239.3 a  |
| W18*1         | 41087.0 abc | 4263.7 a  | 9843.7 d | 13561.1 a | 20939.3 d | 6992.3 cd | 1418.7 a |
| Pr > F(Model) | <0.0001     | <0.0001   | <0.0001  | <0.0001   | <0.0001   | <0.0001   | <0.0001  |

**Table S4.** One-way ANOVA on the volatile compounds for the Time. Only the significant variables are shown according to Tukey HSD test (95% confidence). W: wine, 3, 6, 9, 12,18: months of storage in bottle. Different letters in the same column indicate significant differences evaluated by the *post-hoc* test.

| TIME             | ethyl<br>butanoate | isoamyl<br>alcohol | ethyl<br>hexanoate | hexyl<br>acetate | n-hexanol    | acetic acid  | ethyl<br>nonanoate | isobutyl<br>octanoate | 2,3-butanediol<br>(isomer 2) |
|------------------|--------------------|--------------------|--------------------|------------------|--------------|--------------|--------------------|-----------------------|------------------------------|
| W3               | 9629023.0 a        | 104570857.8<br>a   | 162258509.3<br>ab  | 6553991.2 b      | 2162873.0 a  | 2721137.0 a  | 6071838.5 ab       | 1359837.3 a           | 3172522.2 ab                 |
| W6               | 7176653.5 a        | 275041635.7<br>ab  | 222771644.8<br>b   | 6817206.2 b      | 4619098.8 ab | 7112449.3 ab | 4062815.6 a        | 1272712.4 a           | 2539418.0 a                  |
| W9               | 12830033.8 a       | 417002759.2<br>b   | 158783059.7<br>ab  | 4299457.8 ab     | 8070315.2 bc | 4880609.3 a  | 5210349.2 a        | 1537794.9 ab          | 3030665.9 ab                 |
| W12              | 39258188.3 b       | 395073178.0<br>b   | 236195036.5<br>b   | 5522879.8 ab     | 8293809.5 c  | 12967871.0 b | 8200115.3 ab       | 1946551.8 b           | 2835114.7 ab                 |
| W18              | 11482136.5 a       | 453909448.7<br>b   | 16648003.2 a       | 1679027.6 a      | 6874835.7 bc | 1869598.9 a  | 14998974.5 b       | 1500399.7 ab          | 5026280.5 b                  |
| Pr ><br>F(Model) | 0.0                | 0.0                | 0.0                | 0.0              | 0.0          | 0.0          | 0.0                | 0.0                   | 0.0                          |

  

| TIME             | ethyl<br>decanoate | diethyl<br>succinate | n-decanol    | citronellol  | phenylethyl<br>acetate | ethyl<br>dodecanoate | isoamyl<br>decanoate | butanedioic<br>acid, ethyl<br>isoamyl<br>ester | ethyl<br>tetradecanoate | octanoic acid    |
|------------------|--------------------|----------------------|--------------|--------------|------------------------|----------------------|----------------------|------------------------------------------------|-------------------------|------------------|
| W3               | 514739828.8 ab     | 24056550.2 a         | 1378764.7 a  | 2292382.7 ab | 9889275.0 bc           | 22796018.8 b         | 1593078.3 ab         | 2113721.0 ab                                   | 1844729.0 a             | 25287094.5<br>ab |
| W6               | 844466326.2 b      | 60505449.1 b         | 1605448.3 a  | 3129288.6 b  | 9127683.8 bc           | 26297094.7 b         | 1435522.3 ab         | 1407527.5 a                                    | 2954986.7 ab            | 28670641.3<br>ab |
| W9               | 386349003.5 ab     | 48594399.8 b         | 2144532.2 ab | 1787446.4 ab | 6052694.5 b            | 13033393.8<br>ab     | 1119831.9 a          | 1670046.3 ab                                   | 2281919.5 a             | 11640492.2 a     |
| W12              | 672769804.3 b      | 83944718.0 c         | 3137022.2 b  | 3262661.7 b  | 10147861.7 c           | 25395182.3 b         | 1670410.2 ab         | 3227613.5 b                                    | 6470100.0 b             | 44674105.2 b     |
| W18              | 1955693.5 a        | 85204167.7 c         | 1115411.0 a  | 671486.0 a   | 821468.7 a             | 1046472.7 a          | 1823650.5 b          | 2575638.0 ab                                   | 1252325.2 a             | 28471684.5<br>ab |
| Pr ><br>F(Model) | 0.0                | <0.0001              | 0.0          | 0.0          | <0.0001                | 0.0                  | 0.0                  | 0.0                                            | 0.0                     | 0.0              |



**Table S5.** One-way ANOVA on the volatile compounds for Wine *versus* winemaking technique. Only the significant variables are shown according to Tukey HSD test (95% confidence). V1: vinification without maceration, V2: vinification with maceration. Different letters in the same column indicate significant differences evaluated by the *post-hoc* test.

| WINE          | isobutyl octanoate | 2,3-butanediol (isomer 2) | octanoic acid |
|---------------|--------------------|---------------------------|---------------|
| V1            | 1383650.4 a        | 3931887.9 b               | 37791269.7 b  |
| V2            | 1663268.1 b        | 2709712.6 a               | 17706337.4 a  |
| Pr > F(Model) | 0.0                | 0.0                       | 0.0           |

**Table S6.** Two-way ANOVA on the volatile compounds for Wine\*Time *versus* RT. Only the significant variables are shown according to Tukey HSD test (95% confidence). W: wine, 3, 6, 9, 12,18: months of storage in bottle, 1: wine without maceration, 2: wine with maceration. Different letters in the same column indicate significant differences evaluated by the *post-hoc* test.

| Wine*TIME     | ethyl acetate  | ethyl butanoate | isoamyl acetate | isoamyl alcohol | ethyl hexanoate | hexyl acetate |
|---------------|----------------|-----------------|-----------------|-----------------|-----------------|---------------|
| W6*1          | 153031895.3 e  | 11527325.3 ab   | 166152426.7 c   | 490121298.7 cd  | 374534741.0 f   | 10803738.3 d  |
| W12*2         | 47255205.3 bc  | 28883200.0 ab   | 86189518.0 ab   | 481773448.0 cd  | 189224297.7 cd  | 4148764.7 abc |
| W12*1         | 57362912.3 bcd | 49633176.7 b    | 84277660.0 ab   | 308372908.0 bc  | 283165775.3 e   | 6896995.0 bcd |
| W9*2          | 82743162.3 cd  | 17784800.7 ab   | 112955267.3 bc  | 533103264.0 d   | 191752996.7 cd  | 4833497.3 abc |
| W3*2          | 19850199.0 ab  | 11319695.5 ab   | 111687981.0 b   | 171224785.3 ab  | 213282255.7 d   | 7293433.0 cd  |
| W18*1         | 89356227.3 d   | 10835088.7 ab   | 63984633.3 ab   | 485678554.7 cd  | 18936441.5 a    | 1685984.6 a   |
| W18*2         | 64322600.0 cd  | 12129184.3 ab   | 52657089.3 a    | 422140342.7 cd  | 14359565.0 a    | 1672070.6 a   |
| W3*1          | 8000205.3 a    | 7938350.4 ab    | 51828774.3 a    | 37916930.3 a    | 111234763.0 b   | 5814549.3 abc |
| W9*1          | 25580010.7 ab  | 7875267.0 ab    | 83502280.7 ab   | 300902254.3 bc  | 125813122.7 bc  | 3765418.3 abc |
| W6*2          | 7774152.0 a    | 2825981.7 a     | 38511891.0 a    | 59961972.7 a    | 71008548.7 ab   | 2830674.0 ab  |
| Pr > F(Model) | <0.0001        | 0.0             | <0.0001         | <0.0001         | <0.0001         | <0.0001       |

| Wine*TIME | n-hexanol    | ethyl octanoate | acetic acid   | isopentyl hexanoate | ethyl nonanoate | 2,3-butanediol_1 | isobutyl octanoate |
|-----------|--------------|-----------------|---------------|---------------------|-----------------|------------------|--------------------|
| W6*1      | 6276214.3 c  | 2601210139.3 b  | 12859486.0 de | 3188272.0 c         | 1937586.3 ab    | 8781192.0 b      | 934589.3 a         |
| W12*2     | 11154576.0 e | 921327688.3 a   | 9574614.0 cd  | 1827692.9 ab        | 6322932.0 ab    | 4024661.7 a      | 2142457.7 c        |
| W12*1     | 5433043.0 bc | 534234478.5 a   | 16361128.0 e  | 2669352.3 bc        | 10077298.7 b    | 2290184.6 a      | 1750646.0 bc       |
| W9*2      | 9781021.7 de | 988151097.0 a   | 7526368.3 bc  | 1843773.5 ab        | 964719.7 a      | 3895508.7 a      | 1476147.6 abc      |
| W3*2      | 3018469.0 ab | 1045790439.0 a  | 2920123.0 ab  | 975214.7 a          | 7152031.2 ab    | 4081778.0 a      | 1478973.7 abc      |
| W18*1     | 5651646.3 bc | 574536756.0 a   | 1712576.2 a   | 1154698.0 a         | 23145237.7 c    | 2747458.3 a      | 1392873.3 abc      |
| W18*2     | 8098025.0 cd | 403834919.3 a   | 2026621.7 a   | 2064076.0 abc       | 6852711.3 ab    | 1981934.0 a      | 1607926.0 abc      |

|               |              |               |              |             |              |             |               |
|---------------|--------------|---------------|--------------|-------------|--------------|-------------|---------------|
| W3*1          | 1307277.0 a  | 881745894.7 a | 2522151.0 ab | 1228653.0 a | 4991645.9 ab | 2537712.3 a | 1240700.9 ab  |
| W9*1          | 6359608.7 c  | 514423993.0 a | 2234850.3 a  | 1141624.0 a | 9455978.6 b  | 2901524.3 a | 1599442.3 abc |
| W6*2          | 2961983.3 ab | 464844756.0 a | 1365412.7 a  | 889859.3 a  | 6188044.8 ab | 2082089.3 a | 1610835.4 abc |
| Pr > F(Model) | <0.0001      | <0.0001       | <0.0001      | <0.0001     | <0.0001      | 0.0         | 0.0           |

| Wine*TIME     | n-octanol    | 2,3-butanediol_2 | ethyl decanoate | diethyl succinate | n-decanol    | citronellol    |
|---------------|--------------|------------------|-----------------|-------------------|--------------|----------------|
| W6*1          | 1732492.7 b  | 2552592.7 a      | 1389899738.7 f  | 61099394.7 bcde   | 2259411.7 ab | 4602184.7 d    |
| W12*2         | 1307119.7 ab | 2559706.8 a      | 428472486.7 cd  | 93598986.7 e      | 3113406.0 b  | 3361627.0 cd   |
| W12*1         | 831691.3 a   | 3110522.7 a      | 917067122.0 e   | 74290449.3 cde    | 3160638.3 b  | 3163696.3 bcd  |
| W9*2          | 1430147.7 ab | 2397446.3 a      | 547986787.7 d   | 58576764.7 bc     | 2084102.3 ab | 2179687.3 abcd |
| W3*2          | 1304169.9 ab | 3304293.8 a      | 453558567.0 cd  | 31504899.3 ab     | 2003707.7 ab | 2148977.9 abcd |
| W18*1         | 1241543.4 ab | 7291688.0 b      | 2279866.3 ab    | 92586411.0 de     | 1133988.2 a  | 776763.7 ab    |
| W18*2         | 1100543.1 ab | 2760873.0 a      | 1631520.7 a     | 77821924.3 cde    | 1096833.8 a  | 566208.3 a     |
| W3*1          | 995915.0 ab  | 3040750.6 a      | 575921090.7 d   | 16608201.0 a      | 753821.7 a   | 2435787.5 abcd |
| W9*1          | 1132937.0 ab | 3663885.5 a      | 224711219.3 abc | 38612035.0 ab     | 2204962.0 ab | 1395205.5 abc  |
| W6*2          | 843902.3 a   | 2526243.3 a      | 299032913.7 bcd | 59911503.6 bcd    | 951485.0 a   | 1656392.5 abc  |
| Pr > F(Model) | 0.0          | <0.0001          | <0.0001         | <0.0001           | 0.0          | 0.0            |

| Wine*TIME     | phenylethyl acetate | ethyl dodecanoate | isoamyl decanoate | butanedioic acid, ethyl isoamyl ester | phenylethyl alcohol | ethyl tetradecanoate | octanoic acid |
|---------------|---------------------|-------------------|-------------------|---------------------------------------|---------------------|----------------------|---------------|
| W6*1          | 12563510.0 e        | 39330586.7 c      | 1780219.9 a       | 1695571.7 a                           | 27871428.7 ab       | 4793216.8 a          | 46765207.3 c  |
| W12*2         | 7694521.7 bcd       | 22631257.3 abc    | 1831220.8 a       | 4742694.0 b                           | 44293612.0 b        | 6038062.3 a          | 26807633.0 ab |
| W12*1         | 12601201.7 e        | 28159107.3 bc     | 1509599.7 a       | 1712533.0 a                           | 30305257.7 ab       | 6902137.7 a          | 62540577.3 c  |
| W9*2          | 6393279.7 bcd       | 15849198.0 ab     | 1092926.4 a       | 1757100.0 a                           | 40406222.0 b        | 3096119.9 a          | 12484867.7 a  |
| W3*2          | 9628360.3 cde       | 15412208.3 ab     | 1506264.3 a       | 2264945.5 a                           | 16037198.3 a        | 2346290.7 a          | 26176018.7 ab |
| W18*1         | 864655.7 a          | 965967.3 a        | 2009717.7 a       | 2652980.3 ab                          | 30454393.0 ab       | 1092043.9 a          | 44456276.7 bc |
| W18*2         | 778281.7 a          | 1126978.0 a       | 1637583.3 a       | 2498295.7 a                           | 29723297.3 ab       | 1412606.6 a          | 12487092.3 a  |
| W3*1          | 10150189.7 de       | 30179829.3 bc     | 1679892.3 a       | 1962496.5 a                           | 30509252.8 ab       | 1343167.3 a          | 24398170.3 a  |
| W9*1          | 5712109.4 bc        | 10217589.7 ab     | 1146737.3 a       | 1582992.7 a                           | 27065153.7 ab       | 1467719.0 a          | 10796116.7 a  |
| W6*2          | 5691857.7 b         | 13263602.7 ab     | 1090824.7 a       | 1119483.3 a                           | 31243102.7 ab       | 1116756.7 a          | 10576075.3 a  |
| Pr > F(Model) | <0.0001             | <0.0001           | 0.0               | 0.0                                   | 0.0                 | 0.0                  | <0.0001       |

**Table S7.** One-way ANOVA on the sensory descriptors for the Time. Only the significant variables are shown according to Tukey HSD test (95% confidence). W: wine, 3, 6, 9, 12,18: months of storage in bottle. Different letters in the same column indicate significant differences evaluated by the post-hoc test.

| TIME          | Clarity | Yellow color | Olfactory intensity | Floral | Apple   | Pear   | Tropical fruit |
|---------------|---------|--------------|---------------------|--------|---------|--------|----------------|
| W3            | 8.9 b   | 4.3 b        | 6.4 b               | 4.2 a  | 4.4 a   | 4.1 a  | 3.7 a          |
| W6            | 8.7 ab  | 4.6 b        | 6.2 b               | 4.9 a  | 4.7 ab  | 3.7 a  | 3.9 ab         |
| W9            | 8.5 a   | 4.3 b        | 6.5 b               | 4.8 a  | 4.9 ab  | 4.3 ab | 4.5 bc         |
| W12           | 8.7 ab  | 3.5 a        | 4.4 a               | 4.8 a  | 5.3 bc  | 5.1 b  | 5.0 c          |
| W18           | 8.4 a   | 3.2 a        | 4.2 a               | 4.2 a  | 5.7 c   | 4.0 a  | 3.3 a          |
| Pr > F(Model) | 0.0     | <0.0001      | <0.0001             | 0.0    | <0.0001 | 0.0    | <0.0001        |

| TIME          | Dried fruit | Spicy  | Off-odor | Warmness | Sweetness | Sourness | Saltiness | Bitterness | Overall judgement |
|---------------|-------------|--------|----------|----------|-----------|----------|-----------|------------|-------------------|
| W3            | 3.9 a       | 2.8 ab | 1.6 ab   | 5.0 a    | 4.2 a     | 5.2 a    | 3.6 a     | 3.3 b      | 5.8 a             |
| W6            | 4.3 ab      | 2.3 a  | 1.4 ab   | 5.3 ab   | 4.4 a     | 5.1 a    | 3.7 a     | 3.6 b      | 6.3 abc           |
| W9            | 4.8 b       | 2.7 ab | 1.4 ab   | 5.9 b    | 5.0 b     | 6.0 b    | 4.9 c     | 3.5 b      | 6.7 bc            |
| W12           | 4.4 ab      | 2.2 a  | 1.2 a    | 5.6 ab   | 3.9 a     | 4.9 a    | 4.1 b     | 2.3 a      | 6.1 ab            |
| W18           | 3.8 a       | 3.0 b  | 1.8 b    | 7.0 c    | 4.2 a     | 5.8 b    | 4.8 c     | 3.8 b      | 6.9 c             |
| Pr > F(Model) | 0.0         | 0.0    | 0.0      | <0.0001  | <0.0001   | <0.0001  | <0.0001   | <0.0001    | 0.0               |

**Table S8.** Two-way ANOVA on the sensory descriptors for the Wine\*Time. Only the significant variables are shown according to Tukey HSD test (95% confidence). W: wine, 3, 6, 9, 12,18: months of storage in bottle, 1: wine without maceration, 2: wine with maceration. Different letters in the same column indicate significant differences evaluated by the *post-hoc* test. Only variables with significant differences are shown.

| Wine*TIME     | Yellow color | Olfactory intensity | Floral | Apple    | Pear  | Tropical fruit |
|---------------|--------------|---------------------|--------|----------|-------|----------------|
| W9*1          | 4.8 d        | 6.4 b               | 5.3 b  | 4.8 abcd | 4.2 a | 4.9 bc         |
| W9*2          | 3.8 abcd     | 6.7 b               | 4.3 ab | 4.9 abcd | 4.4 a | 4.0 abc        |
| W6*1          | 4.6 d        | 6.3 b               | 5.2 ab | 4.8 abcd | 3.9 a | 4.0 abc        |
| W18*1         | 2.9 a        | 4.3 a               | 4.1 a  | 5.9 d    | 4.4 a | 3.3 a          |
| W18*2         | 3.5 abc      | 4.2 a               | 4.3 ab | 5.5 bcd  | 3.6 a | 3.3 a          |
| W12*1         | 3.2 ab       | 4.3 a               | 4.6 ab | 5.6 cd   | 5.2 a | 5.0 c          |
| W3*1          | 4.5 cd       | 6.6 b               | 4.2 ab | 4.5 ab   | 4.2 a | 3.8 ab         |
| W12*2         | 3.8 abcd     | 4.5 a               | 5.0 ab | 5.0 abcd | 5.0 a | 5.0 c          |
| W6*2          | 4.5 cd       | 6.0 b               | 4.7 ab | 4.6 abc  | 3.5 a | 3.7 a          |
| W3*2          | 4.2 bcd      | 6.2 b               | 4.1 a  | 4.3 a    | 3.9 a | 3.6 a          |
| Pr > F(Model) | <0.0001      | <0.0001             | 0.0    | 0.0      | 0.0   | <0.0001        |

| Wine*TIME     | Spicy | Warmness | Sweetness | Sourness | Saltiness | Bitterness | Overall judgement |
|---------------|-------|----------|-----------|----------|-----------|------------|-------------------|
| W9*1          | 2.7 a | 5.6 ab   | 5.0 b     | 6.0 c    | 4.9 de    | 3.5 bc     | 7.0 b             |
| W9*2          | 2.8 a | 6.2 bcd  | 5.0 b     | 6.0 bc   | 4.8 de    | 3.5 c      | 6.5 ab            |
| W6*1          | 2.5 a | 5.2 ab   | 4.3 ab    | 5.2 abc  | 3.6 ab    | 3.7 c      | 6.4 ab            |
| W18*1         | 2.9 a | 7.2 d    | 4.3 ab    | 5.8 abc  | 5.0 e     | 3.9 c      | 6.9 b             |
| W18*2         | 3.1 a | 6.9 cd   | 4.2 ab    | 5.9 abc  | 4.6 cde   | 3.8 c      | 6.9 b             |
| W12*1         | 2.0 a | 5.5 ab   | 4.0 a     | 4.8 a    | 4.3 bcd   | 2.5 ab     | 6.1 ab            |
| W3*1          | 2.6 a | 5.1 ab   | 4.1 a     | 5.3 abc  | 3.5 a     | 3.4 bc     | 6.0 ab            |
| W12*2         | 2.4 a | 5.8 abc  | 3.9 a     | 4.9 ab   | 4.0 abc   | 2.2 a      | 6.1 ab            |
| W6*2          | 2.1 a | 5.5 ab   | 4.6 ab    | 5.0 abc  | 3.7 ab    | 3.6 c      | 6.1 ab            |
| W3*2          | 3.0 a | 4.9 a    | 4.3 ab    | 5.1 abc  | 3.7 ab    | 3.3 bc     | 5.6 a             |
| Pr > F(Model) | 0.0   | <0.0001  | 0.0       | 0.0      | <0.0001   | <0.0001    | 0.0               |

**Table S9.** Tentative identification of volatile compounds with respective Retention Time (RT) and calculated Retention Index (RI) [13].

| <b>Tentative compound identification</b> | <b>RT (min)</b> | <b>RI</b> |
|------------------------------------------|-----------------|-----------|
| ethyl acetate                            | 5.2             | 795       |
| ethyl butanoate                          | 8.9             | 1033      |
| isobutyl alcohol                         | 11.0            | 1094      |
| isoamyl acetate                          | 11.9            | 1119      |
| isoamyl alcohol                          | 15.5            | 1207      |
| ethyl hexanoate                          | 16.6            | 1232      |
| hexyl acetate                            | 18.3            | 1271      |
| <i>n</i> -hexanol                        | 21.8            | 1352      |
| ethyl octanoate                          | 25.4            | 1436      |
| acetic acid                              | 26.0            | 1448      |
| isopentyl hexanoate                      | 26.4            | 1458      |
| ethyl nonanoate                          | 29.6            | 1535      |
| 2,3-butanediol                           | 29.7            | 1573      |
| isobutyl octanoate                       | 30.3            | 1551      |
| <i>n</i> -octanol                        | 30.5            | 1556      |
| ethyl decanoate                          | 33.8            | 1638      |
| isoamyl octanoate                        | 34.5            | 1657      |
| diethyl succinate                        | 35.2            | 1674      |
| ethyl 9-decenoate                        | 35.8            | 1689      |
| <i>n</i> -decanol                        | 38.4            | 1759      |
| citronellol                              | 38.5            | 1762      |
| phenylethyl acetate                      | 40.4            | 1812      |
| ethyl dodecanoate                        | 41.4            | 1841      |
| isoamyl decanoate                        | 42.1            | 1860      |
| ethyl isoamyl succinate                  | 43.5            | 1898      |
| phenylethyl alcohol                      | 43.7            | 1905      |
| ethyl tetradecanoate                     | 48.2            | 2050      |
| octanoic acid                            | 48.4            | 2057      |

**Figure S2.** Standardized coefficients and standardized residuals/observations graphs of principal component regression for sensory descriptors. The coefficients are ordered by the  $p$ -value from the lowest to the highest and the rectangular shape indicate the level of significance ( $\alpha = 0.001, 0.01$  and  $0.05$ ). Aroma compounds labels are explicated in **Table 2**. A plot = standardized coefficients for Floral descriptor, B plot = standardized residuals for Floral descriptor, C plot = standardized coefficients for Apple descriptor, D plot = standardized residuals for Apple descriptor, E plot = standardized coefficients for Pear descriptor, F plot = standardized residuals for Pear descriptor, G plot = standardized coefficients for Tropical Fruit descriptor, H plot = standardized residuals for Tropical Fruit descriptor, I plot = standardized coefficients for Dried Fruit descriptor, L plot = standardized residuals for Dried Fruit descriptor, M plot = standardized coefficients for Fresh Veget. descriptor, N plot = standardized residuals for Fresh Veget. descriptor, O plot = standardized coefficients for Spicy descriptor, P plot = standardized residuals for Spicy descriptor, Q plot = standardized coefficients for Cleanliness descriptor, R plot = standardized residuals for Cleanliness descriptor, S plot = standardized coefficients for Off-odour descriptor, T plot = standardized residuals for Off-odour descriptor.

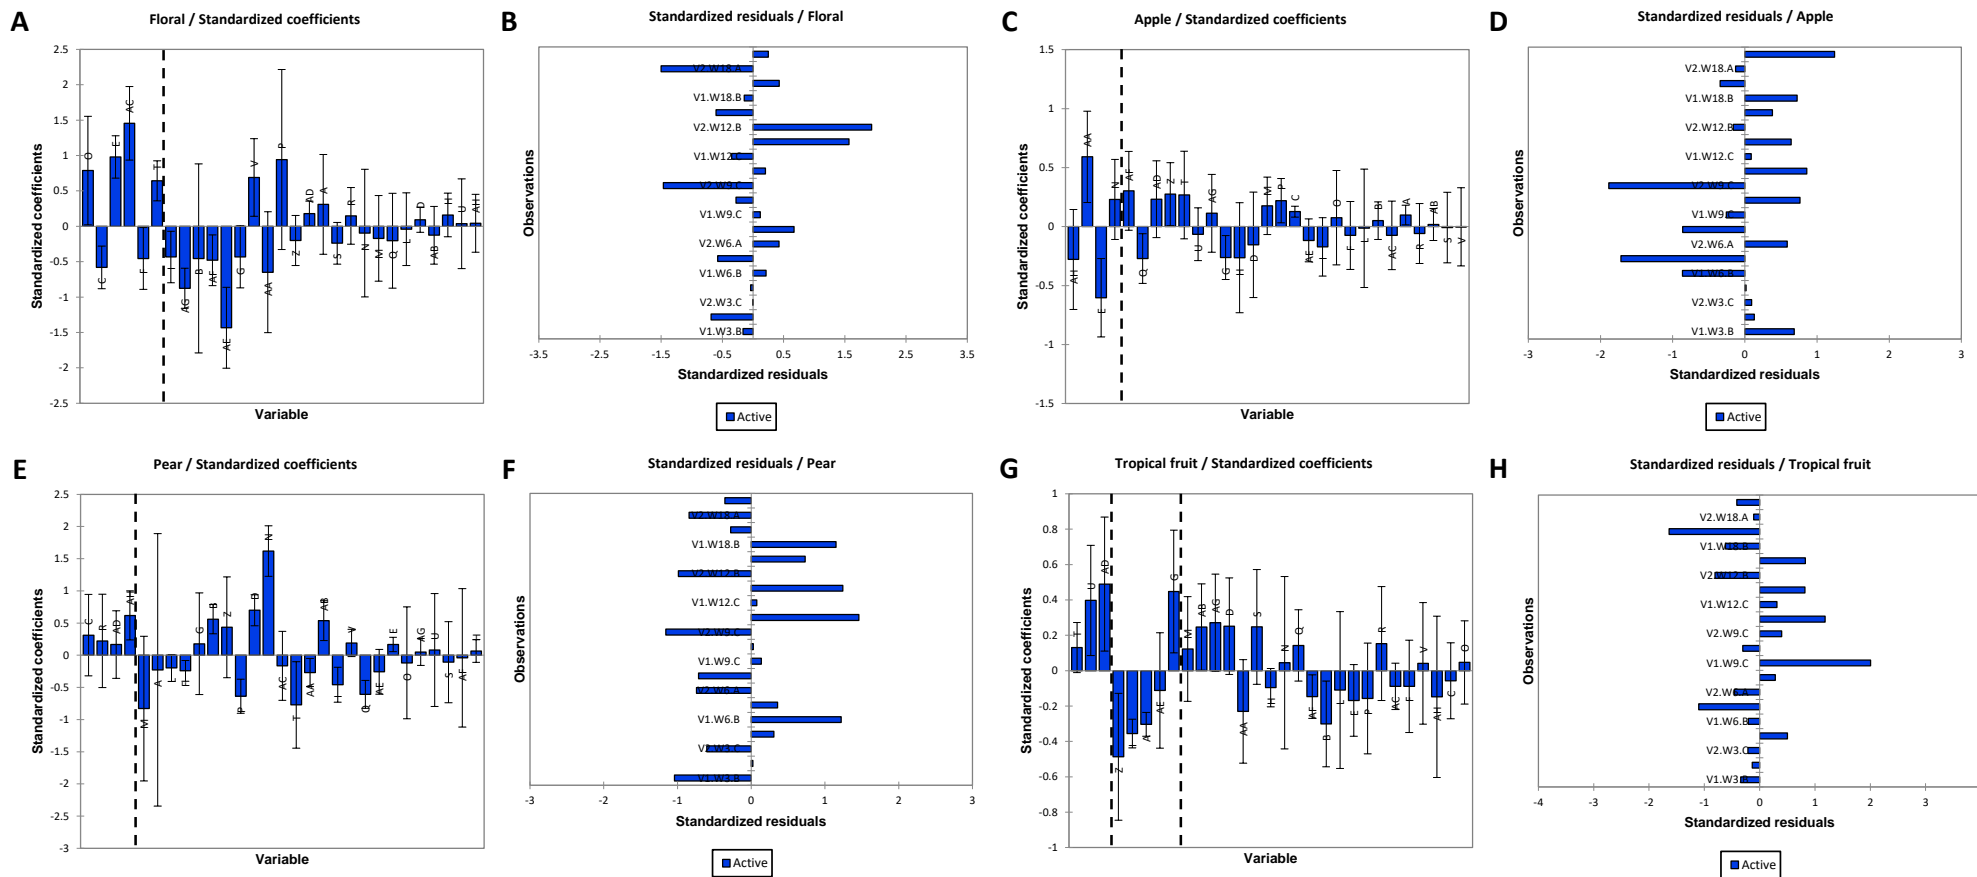

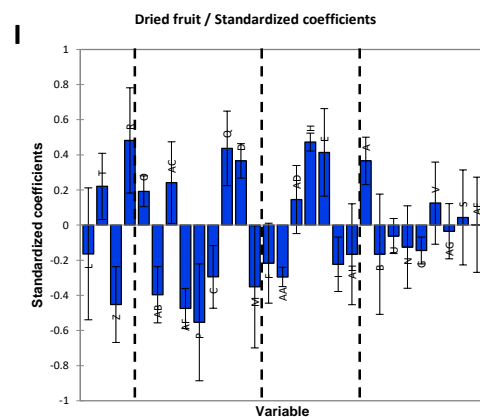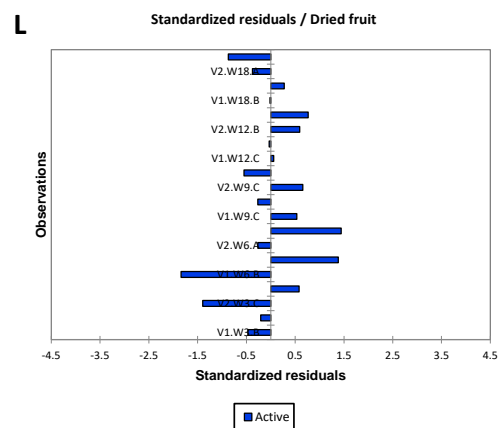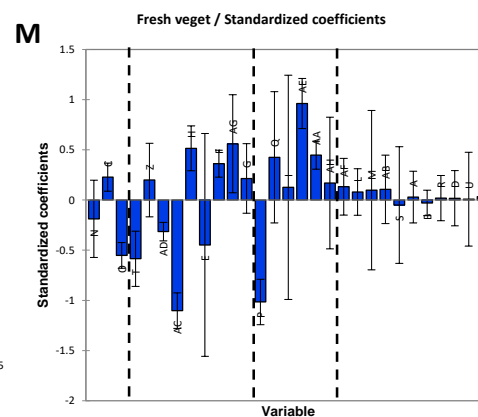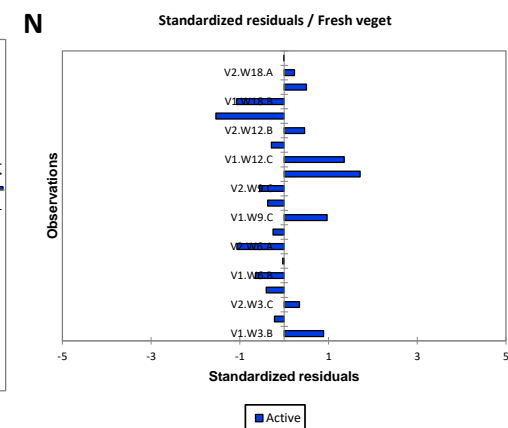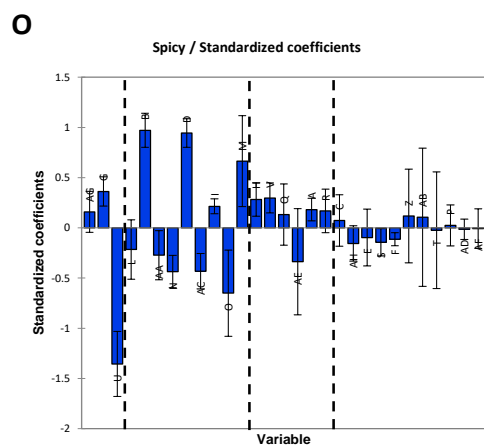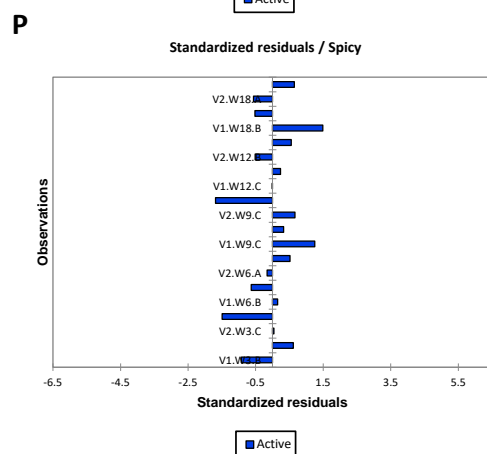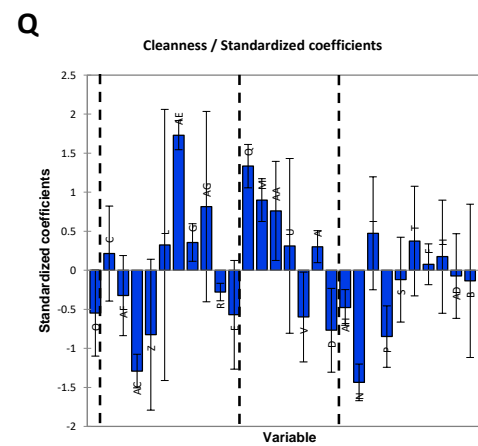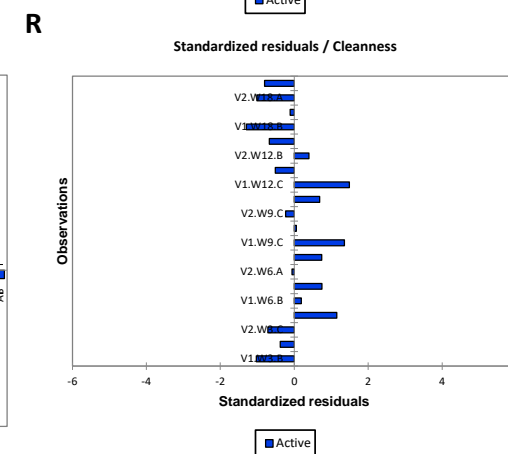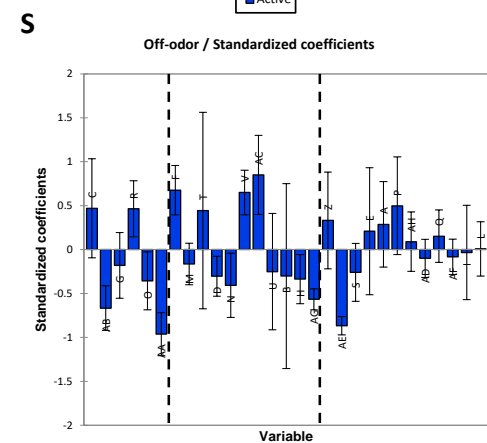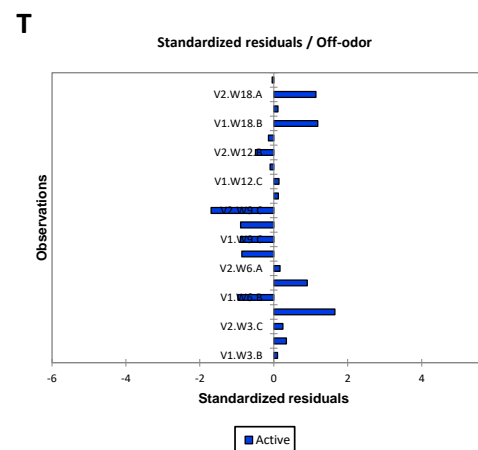

**Table S10.** Tentative identification of non-volatile compounds for the HPLC analysis [13].

| Tentative compound identification | RT (min) | Wavelength (nm) | MS -                | MS +  |
|-----------------------------------|----------|-----------------|---------------------|-------|
| Gallic acid                       | 3.9      | ~277            | 467.1               |       |
|                                   | 4.5      | 264             |                     |       |
|                                   | 4.7      | 264             | 149.0               |       |
|                                   | 5.8      | 357             |                     |       |
|                                   | 6.4      | 293             |                     |       |
|                                   | 6.5      | 261             |                     |       |
|                                   | 7.3      | 263             |                     |       |
|                                   | 7.7      | 260             | 337.0               |       |
|                                   | 10.5     | 283             | 191.0               |       |
|                                   | 12.4     | 266             | 151.0               |       |
|                                   | 12.9     | 261             | 243.0               |       |
|                                   | 16.8     | 274             | 169.1               |       |
|                                   | 17.4     | 295             |                     |       |
|                                   | 20.3     | 284             |                     |       |
|                                   | 21.9     | 329             | 357                 | 487   |
| GRP                               | 22.2     | 328             | 143.1/161.1         |       |
|                                   | 23.4     | 265             | 382.1               |       |
|                                   | 24.1     | 278             | 315.1/378.1/477.2   |       |
|                                   | 24.8     | 328             | 616.1               | 618.1 |
|                                   | 26.2     | 320             |                     |       |
|                                   | 26.6     | 310             |                     |       |
| Caftaric acid                     | 27.2     | 275             |                     |       |
|                                   | 28.0     | ~296, 328       | 311.0/623.1         |       |
| Procyanidin dimer                 | 29.3     | 270             | 443.2/506.1         |       |
|                                   | 31.1     | 275             |                     | 579.1 |
| Coutaric acid-cis                 | 32.8     | ~290, 311       | 295.1, 163.1, 150.1 |       |
| Coutaric acid-trans               | 33.7     | ~290, 312       | 295.1, 163.1, 150.1 |       |
| Fertaric acid                     | 36.4     | 329             | 325.1               |       |
| Caffeic acid                      | 36.9     | ~290, 323       | 179.1               |       |
| Procyanidin dimer                 | 40.0     | 285             |                     |       |
|                                   | 41.7     | 278             |                     | 579.1 |
| Coumaric acid                     | 45.2     | ~284, 308       | 163.1               |       |
|                                   | 47.5     | ~290            | 449.1               |       |
| Astilbin (isomer 1)               | 48.5     | ~290,317        |                     | 487.1 |
|                                   | 49.6     | 287             | 449.1/512.2(add.)   |       |
| Taxifolin                         | 50.2     | 287             | 303.1               |       |
|                                   | 51.8     | ~295            |                     |       |
| Astilbin (isomer 2)               | 52.7     | ~285            |                     |       |
|                                   | 53.0     | 287             | 449.1/512.2(add.)   |       |



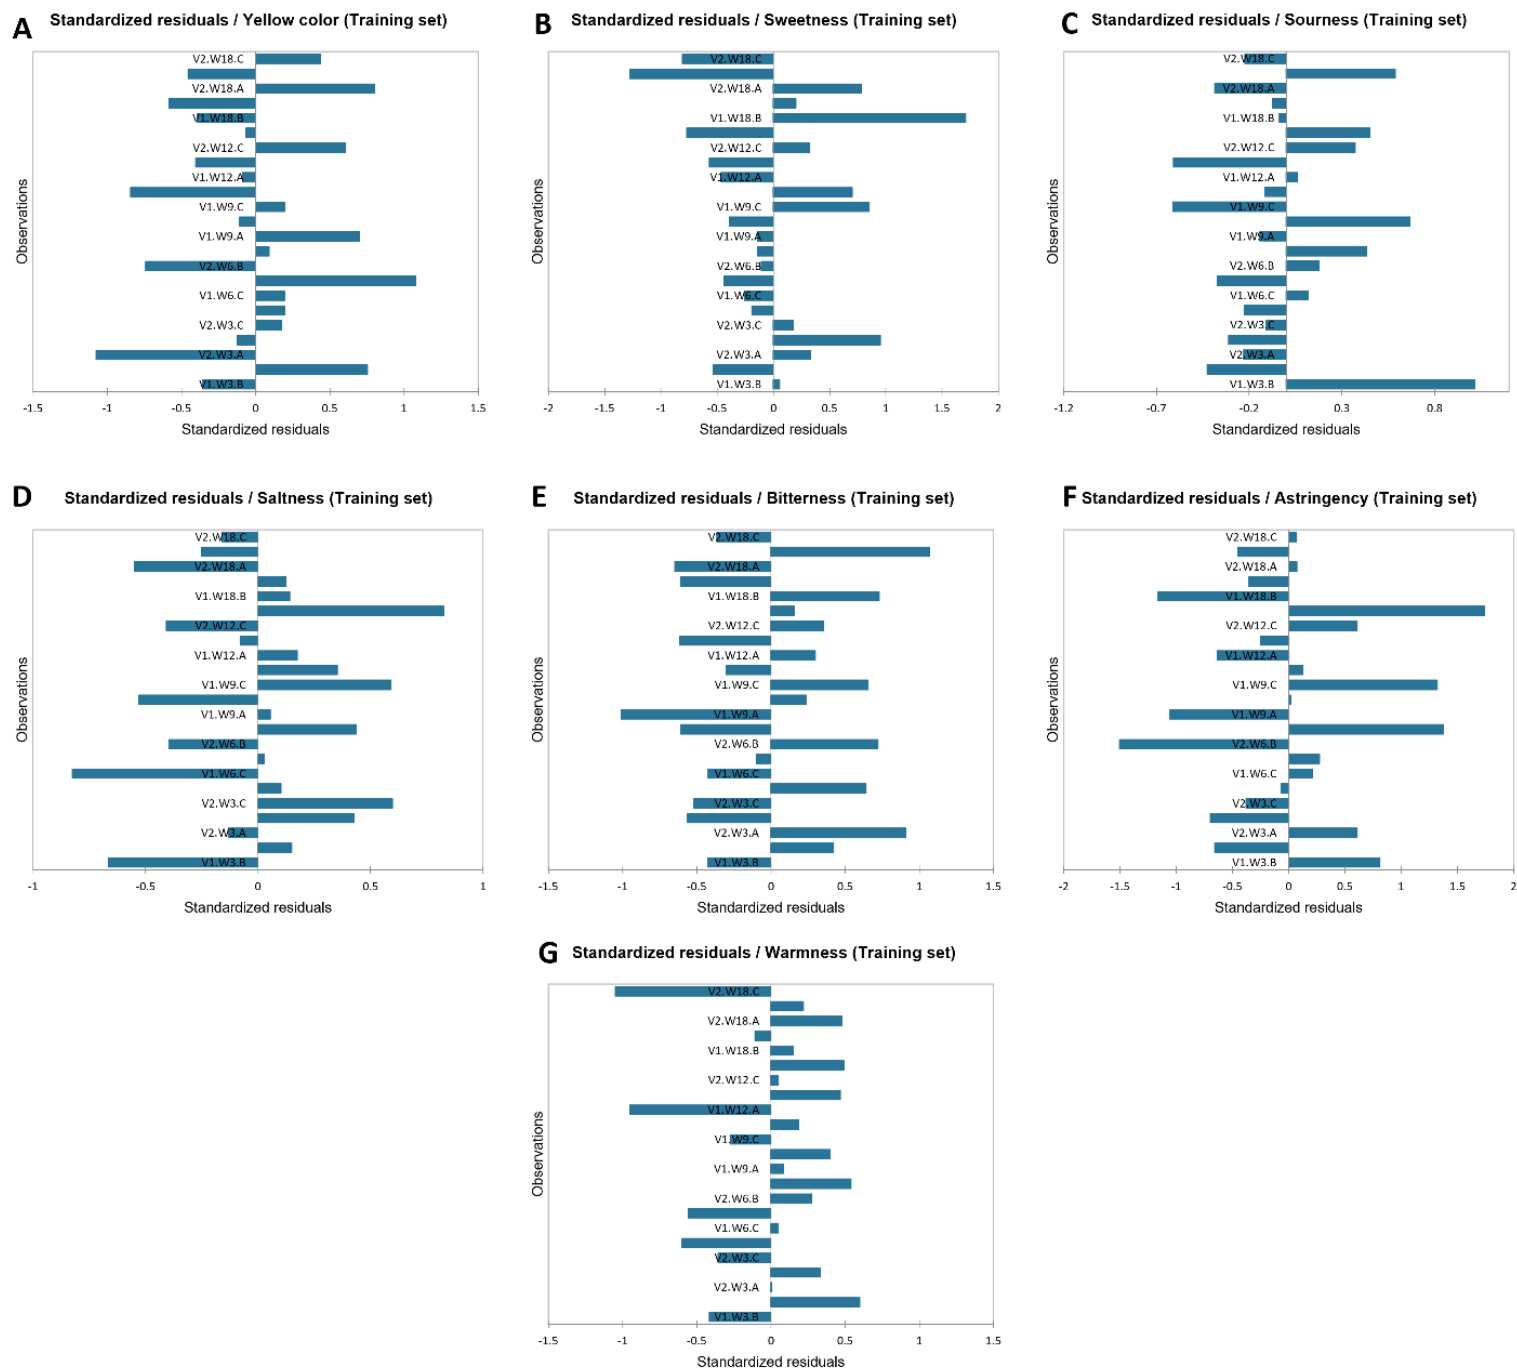

**Figure S3.** Standardized residuals graph of Partial Least Square regression (PLS) for the visual and gustatory descriptors. A: yellow color, B: sweetness, V = wine (V1 and V2),.
